# Supplementary material
Source: publisher figshare collection journal article supplement (https://tandf.figshare.com/articles/dataset/_/1061884)
Supplement: Supplementary file 1 [file 1]

Table S2: The estimated 20-yr return values (RV20y) of annual temperature extremes at 146 stations and 1960-2010 changes therein (from fitting the data in the period 1951-2011 only).

Positive changes are increases, and negative, decreases.

| Station name   | Annual minimum temperatures (TNn) |              |                                         |                                                      |                                    |                              |                     | Annual maximum temperatures (TXx) |                                      |         |                                                      |                                    |                              |         | Climatological values<br>(avgTXx, avgTmean, avgTNn<br>denotes the 1961-1990 mean of<br>TXx, Tmean, TNn, respectively) |          |        |       |        |
|----------------|-----------------------------------|--------------|-----------------------------------------|------------------------------------------------------|------------------------------------|------------------------------|---------------------|-----------------------------------|--------------------------------------|---------|------------------------------------------------------|------------------------------------|------------------------------|---------|-----------------------------------------------------------------------------------------------------------------------|----------|--------|-------|--------|
|                | RV20y of TNn in the               |              | 1960-2010<br>changes in RV20y<br>of TNn | Current<br>waiting<br>time* of<br>RV20yP3<br>(years) | Most<br>suitable<br>GEV<br>model** | NL<br>trend<br>order<br>k*** | RV20y of TXx in the |                                   | 1960-2010 changes<br>in RV20y of TXx |         | Current<br>waiting<br>time* of<br>RV20yP3<br>(years) | Most<br>suitable<br>GEV<br>model** | NL<br>trend<br>order<br>k*** |         |                                                                                                                       |          |        |       |        |
|                | 1960 climate                      | 2010 climate |                                         |                                                      |                                    |                              | 1960 climate        | 2010 climate                      | deg.C                                | %avgTXx |                                                      |                                    |                              |         |                                                                                                                       |          |        |       |        |
|                | (RV20yP3)                         | (RV20yP5)    | deg.C                                   |                                                      |                                    |                              | %avgTNn             | (RV20yP3)                         | (RV20yP5)                            | deg.C   |                                                      |                                    |                              | %avgTXx | avgTXx                                                                                                                | avgTmean | avgTNn | Lat.  | Long.  |
| AGASSIZ        | -18.83                            | -18.83       | 0                                       | 0.0                                                  | 20                                 | 111                          | 0                   | 36.99                             | 36.99                                | 0       | 0.0                                                  | 20                                 | 111                          | 0       | 32.26                                                                                                                 | 9.39     | -10.08 | 49.25 | -121.8 |
| BARKERVILLE    | -44.24                            | -44.24       | 0                                       | 0.0                                                  | 20                                 | 111                          | 0                   | 32.76                             | 32.53                                | -0.24   | -0.8                                                 | 24.98                              | 211                          | 0       | 31                                                                                                                    | 9.57     | -8.74  | 53.07 | -121.5 |
| BELLA COOLA    | -24.01                            | -22.76       | 1.25                                    | 12.5                                                 | 37.88                              | 211                          | 0                   | 36.41                             | 36.41                                | 0       | 0.0                                                  | 20                                 | 111                          | 0       | 24.53                                                                                                                 | 5.28     | -10.03 | 52.37 | -126.7 |
| CRANBROOK      | -37.66                            | -35.59       | 2.07                                    | 12.2                                                 | 110.54                             | 211                          | 0                   | 36.9                              | 36.9                                 | 0       | 0.0                                                  | 20                                 | 111                          | 0       | 31.43                                                                                                                 | 7.84     | -16.97 | 49.62 | -115.8 |
| CRESTON        | -27.08                            | -27.08       | 0                                       | 0.0                                                  | 20                                 | 111                          | 0                   | 37.7                              | 38.32                                | 0.62    | 2.5                                                  | 9.62                               | 311                          | 2       | 24.57                                                                                                                 | 7.04     | -16.68 | 49.1  | -116.5 |
| DARFIELD       | -38.42                            | -34.78       | 3.64                                    | 13.5                                                 | 550.38                             | 211                          | 0                   | 40.01                             | 40.01                                | 0       | 0.0                                                  | 20                                 | 111                          | 0       | 25.88                                                                                                                 | -1.41    | -26.93 | 51.3  | -120.2 |
| FAUQUIER       | -27.39                            | -24.04       | 3.35                                    | 15.9                                                 | 248.57                             | 211                          | 0                   | 37.28                             | 37.28                                | 0       | 0.0                                                  | 20                                 | 111                          | 0       | 32.08                                                                                                                 | 6.21     | -21.04 | 49.87 | -118.1 |
| FORT ST JAMES  | -46.8                             | -46.8        | 0                                       | 0.0                                                  | 20                                 | 111                          | 0                   | 34.73                             | 34.73                                | 0       | 0.0                                                  | 20                                 | 111                          | 0       | 20.38                                                                                                                 | -5.15    | -39.32 | 54.45 | -124.3 |
| GLACIER        | -36.73                            | -34.09       | 2.65                                    | 7.0                                                  | 489.05                             | 211                          | 0                   | 32.25                             | 32.25                                | 0       | 0.0                                                  | 20                                 | 111                          | 0       | 30.85                                                                                                                 | 2.78     | -38.02 | 51.3  | -117.5 |
| GOLDEN         | -40.69                            | -36.01       | 4.67                                    | 12.4                                                 | 999                                | 211                          | 0                   | 36.57                             | 36.57                                | 0       | 0.0                                                  | 20                                 | 111                          | 0       | 31.34                                                                                                                 | 3.88     | -37.59 | 51.3  | -117   |
| GRAND FORKS    | -35.8                             | -32.77       | 3.03                                    | 8.6                                                  | 136.17                             | 211                          | 0                   | 40.63                             | 40.63                                | 0       | 0.0                                                  | 20                                 | 111                          | 0       | 33.68                                                                                                                 | 5.04     | -35.08 | 49.03 | -118.5 |
| KAMLOOPS       | -33.83                            | -32.41       | 1.42                                    | 11.0                                                 | 37.11                              | 211                          | 0                   | 40.32                             | 40.32                                | 0       | 0.0                                                  | 20                                 | 111                          | 0       | 33.6                                                                                                                  | 10.2     | -12.86 | 50.7  | -120.5 |
| KASLO          | -26.37                            | -26.37       | 0                                       | 0.0                                                  | 20                                 | 111                          | 0                   | 36.01                             | 37.22                                | 1.21    | 4.2                                                  | 7.18                               | 211                          | 0       | 28.63                                                                                                                 | 9.93     | -10.45 | 49.92 | -116.9 |
| KELOWNA        | -32.66                            | -28.92       | 3.73                                    | 14.9                                                 | 138.74                             | 211                          | 0                   | 39.09                             | 39.09                                | 0       | 0.0                                                  | 20                                 | 111                          | 0       | 35.99                                                                                                                 | 7.47     | -25.03 | 49.87 | -119.5 |
| PENTICTON      | -24.06                            | -24.06       | 0                                       | 0.0                                                  | 20                                 | 111                          | 0                   | 39.03                             | 39.03                                | 0       | 0.0                                                  | 20                                 | 111                          | 0       | 36.32                                                                                                                 | 9.18     | -17.73 | 49.47 | -119.6 |
| PRINCE GEORGE  | -46.54                            | -42.36       | 4.18                                    | 13.7                                                 | 999                                | 211                          | 0                   | 34.63                             | 34.63                                | 0       | 0.0                                                  | 20                                 | 111                          | 0       | 36.23                                                                                                                 | 6.04     | -30.41 | 53.88 | -122.7 |
| PRINCE RUPERT  | -22.26                            | -19.93       | 2.33                                    | 9.7                                                  | 283.78                             | 311                          | 2                   | 29.47                             | 29.47                                | 0       | 0.0                                                  | 20                                 | 111                          | 0       | 35.53                                                                                                                 | 8.02     | -24.06 | 54.28 | -130.5 |
| PRINCETON      | -40.22                            | -40.22       | 0                                       | 0.0                                                  | 20                                 | 111                          | 0                   | 39.12                             | 39.12                                | 0       | 0.0                                                  | 20                                 | 111                          | 0       | 36.72                                                                                                                 | 7.57     | -26.85 | 49.47 | -120.5 |
| QUATSINO       | -12.19                            | -11.27       | 0.92                                    | 4.7                                                  | 30.85                              | 211                          | 0                   | 31.94                             | 31.94                                | 0       | 0.0                                                  | 20                                 | 111                          | 0       | 33.94                                                                                                                 | 8.02     | -19.75 | 50.53 | -127.7 |
| QUESNEL        | -43.43                            | -41.55       | 1.88                                    | 9.6                                                  | 74.45                              | 211                          | 0                   | 37.64                             | 37.64                                | 0       | 0.0                                                  | 20                                 | 111                          | 0       | 34.33                                                                                                                 | 7.49     | -19.49 | 53.03 | -122.5 |
| SALMON ARM     | -34.17                            | -31.43       | 2.74                                    | 13.6                                                 | 117.55                             | 211                          | 0                   | 38.67                             | 38.67                                | 0       | 0.0                                                  | 20                                 | 111                          | 0       | 32.74                                                                                                                 | 7.32     | -20.11 | 50.68 | -119.2 |
| SHAWNIGAN LAKE | -15.44                            | -15.44       | 0                                       | 0.0                                                  | 20                                 | 111                          | 0                   | 35.34                             | 35.34                                | 0       | 0.0                                                  | 20                                 | 111                          | 0       | 29.78                                                                                                                 | 2.25     | -32.75 | 48.65 | -123.6 |
| STEWART        | -27.08                            | -25.16       | 1.92                                    | 5.6                                                  | 219.98                             | 211                          | 0                   | 33.01                             | 33.01                                | 0       | 0.0                                                  | 20                                 | 111                          | 0       | 26.69                                                                                                                 | -0.16    | -34.49 | 55.93 | -130   |
| TERRACE        | -27.27                            | -22.43       | 4.84                                    | 18.8                                                 | 999                                | 311                          | 1.9                 | 35.53                             | 35.53                                | 0       | 0.0                                                  | 20                                 | 111                          | 0       | 37.38                                                                                                                 | 8.75     | -25.81 | 54.47 | -128.6 |
| VANCOUVER      | -16.55                            | -16.55       | 0                                       | 0.0                                                  | 20                                 | 111                          | 0                   | 31.36                             | 31.36                                | 0       | 0.0                                                  | 20                                 | 111                          | 0       | 30.31                                                                                                                 | 3.17     | -28.31 | 49.2  | -123.2 |
| VAVENBY        | -41.04                            | -36          | 5.05                                    | 16.6                                                 | 780.17                             | 211                          | 0                   | 39.46                             | 39.46                                | 0       | 0.0                                                  | 20                                 | 111                          | 0       | 35.75                                                                                                                 | 6.24     | -30.48 | 51.58 | -119.8 |
| VERNON         | -32.69                            | -31.24       | 1.45                                    | 4.8                                                  | 38.6                               | 211                          | 0                   | 38.79                             | 38.66                                | -0.13   | -0.4                                                 | 23.05                              | 211                          | 0       | 29.05                                                                                                                 | 1.51     | -30.06 | 50.23 | -119.2 |
| VICTORIA       | -14.9                             | -14.9        | 0                                       | 0.0                                                  | 20                                 | 111                          | 0                   | 35.48                             | 35.48                                | 0       | 0.0                                                  | 20                                 | 111                          | 0       | 33.58                                                                                                                 | 4.76     | -32.48 | 48.45 | -123.3 |

|                 |        |        |      |      |        |     |   |       |       |      |      |       |     |   |       |        |        |       |        |
|-----------------|--------|--------|------|------|--------|-----|---|-------|-------|------|------|-------|-----|---|-------|--------|--------|-------|--------|
| DAWSON          | -56.42 | -55.42 | 1    | 1.9  | 43.2   | 211 | 0 | 33.47 | 34.14 | 0.66 | 2.2  | 10.96 | 211 | 0 | 30.31 | -5.3   | -51.73 | 64.05 | -139.1 |
| FORT SIMPSON    | -51.63 | -50.15 | 1.49 | 3.3  | 47.26  | 211 | 0 | 35.15 | 36.42 | 1.27 | 4.0  | 9.19  | 211 | 0 | 31.55 | -3.51  | -45.59 | 61.77 | -121.2 |
| FORT SMITH      | -50.92 | -46.36 | 4.56 | 10.0 | 999    | 211 | 0 | 35.21 | 35.21 | 0    | 0.0  | 20    | 111 | 0 | 31.49 | -2.63  | -45.38 | 60.02 | -112   |
| HAY RIVER       | -48.09 | -44.72 | 3.38 | 7.7  | 999    | 211 | 0 | 34.47 | 34.47 | 0    | 0.0  | 20    | 111 | 0 | 31.33 | -3.1   | -43.62 | 60.83 | -115.8 |
| BANFF           | -46.43 | -46.43 | 0    | 0.0  | 20     | 111 | 0 | 33.44 | 33.44 | 0    | 0.0  | 20    | 111 | 0 | 31.49 | 2.69   | -39    | 51.2  | -115.6 |
| BEAVERLODGE     | -44.92 | -44.92 | 0    | 0.0  | 20     | 111 | 0 | 34.03 | 34.03 | 0    | 0.0  | 20    | 111 | 0 | 31.56 | 2.39   | -38.61 | 55.2  | -119.4 |
| CALGARY         | -40.06 | -40.06 | 0    | 0.0  | 20     | 111 | 0 | 34.95 | 34.95 | 0    | 0.0  | 20    | 111 | 0 | 32.18 | 2.05   | -39.05 | 51.12 | -114   |
| CALMAR          | -47.44 | -47.44 | 0    | 0.0  | 20     | 111 | 0 | 34.72 | 34.72 | 0    | 0.0  | 20    | 111 | 0 | 31.95 | 2.46   | -38.37 | 53.28 | -113.9 |
| CAMPSIE         | -49.88 | -49.88 | 0    | 0.0  | 20     | 111 | 0 | 35.08 | 35.08 | 0    | 0.0  | 20    | 111 | 0 | 31.24 | 2.99   | -34.76 | 54.13 | -114.7 |
| EDMONTON        | -49.36 | -49.36 | 0    | 0.0  | 20     | 111 | 0 | 34.49 | 34.49 | 0    | 0.0  | 20    | 111 | 0 | 32.62 | 4.23   | -33.47 | 53.57 | -113.5 |
| EDSON           | -46.14 | -46.14 | 0    | 0.0  | 20     | 111 | 0 | 34.71 | 34.71 | 0    | 0.0  | 20    | 111 | 0 | 34.15 | 0.38   | -37.67 | 53.58 | -116.5 |
| FORT CHIPEWYAN  | -50.15 | -49.81 | 0.34 | 0.9  | 26.53  | 211 | 0 | 33.85 | 33.85 | 0    | 0.0  | 20    | 111 | 0 | 25.39 | -1.56  | -39.09 | 58.77 | -111.1 |
| FORT MCMURRAY   | -48.56 | -43.24 | 5.32 | 14.7 | 999    | 211 | 0 | 36.56 | 36.56 | 0    | 0.0  | 20    | 111 | 0 | 36.67 | 5.8    | -36.29 | 56.65 | -111.2 |
| GLEICHEN        | -43.26 | -43.26 | 0    | 0.0  | 20     | 111 | 0 | 36.98 | 36.98 | 0    | 0.0  | 20    | 111 | 0 | 33.11 | 4.85   | -34.93 | 50.88 | -113.1 |
| LACOMBE         | -46.34 | -46.34 | 0    | 0.0  | 20     | 111 | 0 | 36.17 | 36.17 | 0    | 0.0  | 20    | 111 | 0 | 31.16 | 1.83   | -35.77 | 52.45 | -113.8 |
| LETHBRIDGE      | -40.98 | -38.54 | 2.43 | 5.5  | 999    | 211 | 0 | 37.13 | 37.13 | 0    | 0.0  | 20    | 111 | 0 | 27.04 | -1.63  | -44.31 | 49.63 | -112.8 |
| MEDICINE HAT    | -45.25 | -45.25 | 0    | 0.0  | 20     | 111 | 0 | 39.76 | 39.76 | 0    | 0.0  | 20    | 111 | 0 | 30.92 | 1.9    | -39.59 | 50.02 | -110.7 |
| OLDS            | -40.95 | -38.17 | 2.78 | 6.7  | 999    | 211 | 0 | 34.88 | 34.88 | 0    | 0.0  | 20    | 111 | 0 | 32.67 | 0.51   | -41.71 | 51.78 | -114.1 |
| PINCHER CREEK   | -41.64 | -41.64 | 0    | 0.0  | 20     | 111 | 0 | 35.52 | 35.52 | 0    | 0.0  | 20    | 111 | 0 | 30.86 | 1.99   | -38.89 | 49.52 | -114   |
| RANFURLY        | -46.39 | -42.53 | 3.86 | 6.9  | 999    | 211 | 0 | 36.2  | 38.09 | 1.89 | 35.1 | 6.16  | 211 | 0 | 5.38  | -21.34 | -56.19 | 53.42 | -111.7 |
| INDIAN HEAD     | -45.13 | -45.13 | 0    | 0.0  | 20     | 111 | 0 | 38.67 | 38.67 | 0    | 0.0  | 20    | 111 | 0 | 34.46 | 1.25   | -38.78 | 50.55 | -103.7 |
| LOST RIVER      | -46.31 | -46.31 | 0    | 0.0  | 20     | 111 | 0 | 38.38 | 38.38 | 0    | 0.0  | 20    | 111 | 0 | 37.02 | 3.88   | -36.19 | 53.28 | -104.3 |
| MOOSE JAW       | -43.4  | -43.4  | 0    | 0.0  | 20     | 111 | 0 | 39.34 | 39.34 | 0    | 0.0  | 20    | 111 | 0 | 36.1  | 2.93   | -38.26 | 50.33 | -105.6 |
| NORTHBATTLEFORD | -47.29 | -47.29 | 0    | 0.0  | 20     | 111 | 0 | 37.52 | 37.52 | 0    | 0.0  | 20    | 111 | 0 | 28.37 | -3.6   | -41.55 | 52.77 | -108.3 |
| OUTLOOK         | -45.24 | -45.24 | 0    | 0.0  | 20     | 111 | 0 | 38.95 | 38.95 | 0    | 0.0  | 20    | 111 | 0 | 35.42 | 3.73   | -36.52 | 51.48 | -107.1 |
| PRINCE ALBERT   | -48.81 | -46.09 | 2.71 | 6.9  | 135.03 | 211 | 0 | 36.73 | 36.73 | 0    | 0.0  | 20    | 111 | 0 | 34.41 | 2.1    | -39.06 | 53.22 | -105.7 |
| REGINA          | -44.32 | -42.42 | 1.9  | 4.8  | 194.91 | 211 | 0 | 39.77 | 39.77 | 0    | 0.0  | 20    | 111 | 0 | 34.46 | 1.56   | -39.6  | 50.43 | -104.7 |
| SASKATOON       | -45.7  | -45.7  | 0    | 0.0  | 20     | 111 | 0 | 39.15 | 39.15 | 0    | 0.0  | 20    | 111 | 0 | 33.1  | 1.49   | -38.38 | 52.17 | -106.7 |
| SCOTT           | -47.23 | -47.23 | 0    | 0.0  | 20     | 111 | 0 | 38.07 | 38.07 | 0    | 0.0  | 20    | 111 | 0 | 36.05 | -0.27  | -39.7  | 52.37 | -108.8 |
| SWIFT CURRENT   | -42.99 | -42.99 | 0    | 0.0  | 20     | 111 | 0 | 38.55 | 38.55 | 0    | 0.0  | 20    | 111 | 0 | 33.53 | 0.9    | -42.04 | 50.27 | -107.7 |
| WASECA          | -45.41 | -41.1  | 4.32 | 11.1 | 999    | 211 | 0 | 36.92 | 36.92 | 0    | 0.0  | 20    | 111 | 0 | 35.24 | 2.32   | -38.81 | 53.13 | -109.4 |
| YELLOW GRASS    | -43.44 | -43.44 | 0    | 0.0  | 20     | 111 | 0 | 41.15 | 41.15 | 0    | 0.0  | 20    | 111 | 0 | 33.38 | 0.3    | -41.2  | 49.82 | -104.2 |
| BRANDON         | -44.82 | -44.82 | 0    | 0.0  | 20     | 111 | 0 | 40.06 | 40.06 | 0    | 0.0  | 20    | 111 | 0 | 36.05 | 2.27   | -39.68 | 49.87 | -99.98 |
| DAUPHIN         | -42.73 | -42.73 | 0    | 0.0  | 20     | 111 | 0 | 37.72 | 37.72 | 0    | 0.0  | 20    | 111 | 0 | 36.23 | 3.67   | -34.37 | 51.1  | -100.1 |
| INDIAN BAY      | -43.91 | -43.91 | 0    | 0.0  | 20     | 111 | 0 | 35.74 | 35.74 | 0    | 0.0  | 20    | 111 | 0 | 33.61 | 2.17   | -41.59 | 49.62 | -95.2  |

|                 |        |        |      |      |        |     |     |       |       |       |      |       |     |     |       |        |        |       |        |
|-----------------|--------|--------|------|------|--------|-----|-----|-------|-------|-------|------|-------|-----|-----|-------|--------|--------|-------|--------|
| MORDEN EXP FARM | -40.15 | -40.15 | 0    | 0.0  | 20     | 111 | 0   | 40.04 | 39.23 | -0.81 | -2.3 | 37.86 | 211 | 0   | 35.17 | 2.78   | -36.94 | 49.18 | -98.08 |
| PINAWA          | -45.03 | -45.03 | 0    | 0.0  | 20     | 111 | 0   | 36.34 | 36.34 | 0     | 0.0  | 20    | 111 | 0   | 32.57 | 2.21   | -39.31 | 50.18 | -96.07 |
| SPRAGUE         | -46.79 | -46.79 | 0    | 0.0  | 20     | 111 | 0   | 36.74 | 36.74 | 0     | 0.0  | 20    | 111 | 0   | 33.1  | 2.06   | -40.03 | 49.02 | -95.6  |
| THE PAS         | -45.51 | -43.28 | 2.23 | 5.8  | 140.86 | 311 | 1.6 | 35.75 | 35.75 | 0     | 0.0  | 20    | 111 | 0   | 34.76 | 1.76   | -38.23 | 53.97 | -101.1 |
| WINNIPEG        | -43.76 | -43.76 | 0    | 0.0  | 20     | 111 | 0   | 38.42 | 38.42 | 0     | 0.0  | 20    | 111 | 0   | 32.07 | 0.06   | -40.72 | 49.92 | -97.23 |
| BEATRICE        | -40.01 | -40.01 | 0    | 0.0  | 20     | 111 | 0   | 34.71 | 34.71 | 0     | 0.0  | 20    | 111 | 0   | 28.74 | -0.8   | -42.52 | 45.13 | -79.4  |
| BROCKVILLE      | -34.27 | -31.1  | 3.16 | 7.7  | 589.34 | 211 | 0   | 35.59 | 35.59 | 0     | 0.0  | 20    | 111 | 0   | 27.37 | -1.43  | -41.12 | 44.6  | -75.67 |
| DRYDEN          | -43.79 | -40.98 | 2.82 | 7.7  | 690.48 | 211 | 0   | 35.83 | 35.83 | 0     | 0.0  | 20    | 111 | 0   | 32.35 | 2.67   | -36.65 | 49.78 | -92.83 |
| FORT FRANCES    | -43.87 | -43.87 | 0    | 0.0  | 20     | 111 | 0   | 37.15 | 37.15 | 0     | 0.0  | 20    | 111 | 0   | 32.38 | 1.61   | -39.77 | 48.65 | -93.43 |
| GORE BAY        | -35.08 | -35.08 | 0    | 0.0  | 20     | 111 | 0   | 34.46 | 34.46 | 0     | 0.0  | 20    | 111 | 0   | 33.08 | 2.83   | -35.87 | 45.88 | -82.57 |
| HALIBURTON      | -42.02 | -42.02 | 0    | 0.0  | 20     | 111 | 0   | 35.27 | 35.27 | 0     | 0.0  | 20    | 111 | 0   | 32.67 | 0.99   | -40.01 | 45.03 | -78.53 |
| HARROW          | -26.31 | -26.31 | 0    | 0.0  | 20     | 111 | 0   | 37.95 | 37.95 | 0     | 0.0  | 20    | 111 | 0   | 32.85 | -0.49  | -39.65 | 42.03 | -82.9  |
| KAPUSKASING     | -44.69 | -42.71 | 1.98 | 6.5  | 161.9  | 311 | 1.1 | 36.26 | 36.26 | 0     | 0.0  | 20    | 111 | 0   | 30.25 | 5.46   | -30.35 | 49.42 | -82.47 |
| KENORA          | -41.18 | -39.13 | 2.05 | 6.2  | 137.19 | 211 | 0   | 36.07 | 36.07 | 0     | 0.0  | 20    | 111 | 0   | 27.61 | -0.21  | -32.9  | 49.78 | -94.37 |
| KINGSTON        | -34.55 | -34.55 | 0    | 0.0  | 20     | 111 | 0   | 34.45 | 34.45 | 0     | 0.0  | 20    | 111 | 0   | -3.27 | -21.16 | -46.94 | 44.22 | -76.6  |
| LONDON          | -30.18 | -30.18 | 0    | 0.0  | 20     | 111 | 0   | 36.89 | 36.89 | 0     | 0.0  | 20    | 111 | 0   | 32.33 | 6.49   | -32.12 | 43.03 | -81.15 |
| MOOSONEE        | -44.06 | -42.98 | 1.08 | 3.6  | 56.55  | 211 | 0   | 36.34 | 36.34 | 0     | 0.0  | 20    | 111 | 0   | 33.34 | 6.04   | -29.82 | 51.27 | -80.65 |
| MORRISBURG      | -38.2  | -33.94 | 4.27 | 11.1 | 999    | 311 | 1.9 | 35.34 | 36.2  | 0.85  | 3.2  | 9.88  | 311 | 1.5 | 26.61 | 0.95   | -38.39 | 44.92 | -75.18 |
| OTTAWA          | -35.64 | -33.39 | 2.26 | 6.5  | 216.05 | 211 | 0   | 37    | 37    | 0     | 0.0  | 20    | 111 | 0   | 13.98 | -7.34  | -34.74 | 45.38 | -75.72 |
| OWEN SOUND      | -32.88 | -32.88 | 0    | 0.0  | 20     | 111 | 0   | 35.77 | 35.77 | 0     | 0.0  | 20    | 111 | 0   | 34.97 | 9.57   | -21.83 | 44.58 | -80.93 |
| PETERBOROUGH    | -38.82 | -38.82 | 0    | 0.0  | 20     | 111 | 0   | 35.81 | 35.81 | 0     | 0.0  | 20    | 111 | 0   | 32.94 | 7.6    | -23.52 | 44.23 | -78.37 |
| SIOUX LOOKOUT   | -44.05 | -41.32 | 2.73 | 12.7 | 761.68 | 311 | 1.7 | 36.42 | 36.42 | 0     | 0.0  | 20    | 111 | 0   | 33.77 | 8.96   | -21.56 | 50.12 | -91.9  |
| THUNDER BAY     | -41.55 | -41.55 | 0    | 0.0  | 20     | 111 | 0   | 36.54 | 36.54 | 0     | 0.0  | 20    | 111 | 0   | 22.47 | -2.11  | -40.22 | 48.37 | -89.33 |
| TORONTO         | -28.32 | -28.32 | 0    | 0.0  | 20     | 111 | 0   | 37.58 | 37.58 | 0     | 0.0  | 20    | 111 | 0   | 28.16 | 2.42   | -33.91 | 43.67 | -79.4  |
| BAGOTVILLE      | -40.39 | -38.2  | 2.19 | 6.6  | 194.5  | 211 | 0   | 36.5  | 36.5  | 0     | 0.0  | 20    | 111 | 0   | 28.23 | 2.73   | -33.17 | 48.33 | -71    |
| BEAUCEVILLE     | -41    | -41    | 0    | 0.0  | 20     | 111 | 0   | 34.79 | 34.79 | 0     | 0.0  | 20    | 111 | 0   | 32.05 | 5.06   | -30.18 | 46.15 | -70.7  |
| BROME           | -40.87 | -40.87 | 0    | 0.0  | 20     | 111 | 0   | 34.16 | 34.16 | 0     | 0.0  | 20    | 111 | 0   | 1.04  | -26.57 | -54.82 | 45.18 | -72.57 |
| LA POCATIERE    | -33.46 | -32.58 | 0.88 | 2.5  | 45.23  | 211 | 0   | 34.15 | 34.15 | 0     | 0.0  | 20    | 111 | 0   | 32.4  | 5.31   | -35.09 | 47.35 | -70.03 |
| LENNOXVILLE     | -40.87 | -36.75 | 4.11 | 15.8 | 999    | 211 | 0   | 35.33 | 35.33 | 0     | 0.0  | 20    | 111 | 0   | 32.71 | 7.51   | -25.96 | 45.37 | -71.82 |
| LES CEDRES      | -35.95 | -34.73 | 1.22 | 3.1  | 57.95  | 211 | 0   | 35.66 | 35.66 | 0     | 0.0  | 20    | 111 | 0   | 14.62 | -8.87  | -39.31 | 45.3  | -74.05 |
| MONT JOLI       | -34.31 | -34.31 | 0    | 0.0  | 20     | 111 | 0   | 33.69 | 33.69 | 0     | 0.0  | 20    | 111 | 0   | 23.02 | -2.75  | -40.86 | 48.6  | -68.2  |
| MONTREAL TAVISH | -31.96 | -31.96 | 0    | 0.0  | 20     | 111 | 0   | 34.91 | 34.91 | 0     | 0.0  | 20    | 111 | 0   | 15.02 | -8.9   | -40.46 | 45.47 | -73.75 |
| NICOLET         | -37.71 | -37.71 | 0    | 0.0  | 20     | 111 | 0   | 35.01 | 35.01 | 0     | 0.0  | 20    | 111 | 0   | 27.08 | 0.76   | -31.6  | 46.2  | -72.62 |
| QUEBEC          | -34.44 | -33.35 | 1.09 | 3.9  | 68.75  | 211 | 0   | 34.46 | 34.46 | 0     | 0.0  | 20    | 111 | 0   | 31.14 | 3.43   | -28.29 | 46.8  | -71.38 |
| TETE BALEINE    | -38.8  | -36.87 | 1.94 | 5.6  | 112.83 | 311 | 1.1 | 30.43 | 30.43 | 0     | 0.0  | 20    | 111 | 0   | 33.35 | 2.64   | -34.88 | 50.7  | -59.32 |

|                |        |        |      |      |        |     |     |       |       |      |      |       |     |     |       |        |        |       |        |
|----------------|--------|--------|------|------|--------|-----|-----|-------|-------|------|------|-------|-----|-----|-------|--------|--------|-------|--------|
| CHATHAM MIRA.  | -35.5  | -35.5  | 0    | 0.0  | 20     | 111 | 0   | 36.66 | 36.66 | 0    | 0.0  | 20    | 111 | 0   | 34.19 | 4.65   | -29.28 | 47.02 | -65.47 |
| FREDERICTON    | -35.92 | -35.92 | 0    | 0.0  | 20     | 111 | 0   | 36.13 | 36.13 | 0    | 0.0  | 20    | 111 | 0   | 33.72 | 5.67   | -30.26 | 45.87 | -66.53 |
| MONCTON        | -30.87 | -30.87 | 0    | 0.0  | 20     | 111 | 0   | 34.64 | 36.07 | 1.43 | 4.5  | 5.9   | 211 | 0   | 31.93 | 5.4    | -27.66 | 46.1  | -64.68 |
| SAINT JOHN     | -32.84 | -32.84 | 0    | 0.0  | 20     | 111 | 0   | 32.51 | 33.59 | 1.08 | 3.7  | 7.37  | 211 | 0   | 29.55 | 4.65   | -29.78 | 45.32 | -65.88 |
| SUSSEX         | -38.3  | -35.07 | 3.23 | 10.2 | 115.76 | 211 | 0   | 34.71 | 36.54 | 1.83 | 5.7  | 4.46  | 211 | 0   | 31.89 | 5.48   | -31.72 | 45.72 | -65.53 |
| HALIFAX        | -26.39 | -26.39 | 0    | 0.0  | 20     | 111 | 0   | 33.32 | 33.66 | 0.34 | 1.1  | 14.08 | 211 | 0   | 29.9  | 6.76   | -21.13 | 44.65 | -63.58 |
| KENTVILLE      | -28.79 | -28.79 | 0    | 0.0  | 20     | 111 | 0   | 35.25 | 35.74 | 0.5  | 1.6  | 13.15 | 211 | 0   | 31.82 | 6.91   | -22.45 | 45.07 | -64.48 |
| NAPPAN         | -34.15 | -34.15 | 0    | 0.0  | 20     | 111 | 0   | 32.65 | 32.65 | 0    | 0.0  | 20    | 111 | 0   | 29.45 | 5.58   | -28.74 | 45.77 | -64.25 |
| PARRSBORO      | -33.5  | -33.5  | 0    | 0.0  | 20     | 111 | 0   | 31.43 | 31.43 | 0    | 0.0  | 20    | 111 | 0   | 31.66 | 5.95   | -29.6  | 45.4  | -64.33 |
| SABLE ISLAND   | -16.84 | -16.84 | 0    | 0.0  | 20     | 111 | 0   | 26.2  | 26.59 | 0.38 | 1.6  | 13.76 | 211 | 0   | 24.06 | 1.93   | -29.09 | 43.93 | -60.02 |
| SYDNEY         | -29.42 | -29.42 | 0    | 0.0  | 20     | 111 | 0   | 33.99 | 33.99 | 0    | 0.0  | 20    | 111 | 0   | 23.53 | 7.62   | -12.65 | 46.17 | -60.05 |
| UPPER STEWACKE | -35.73 | -35.73 | 0    | 0.0  | 20     | 111 | 0   | 34.55 | 35.23 | 0.68 | 2.2  | 10.82 | 211 | 0   | 31.33 | 5.81   | -21.93 | 45.22 | -63    |
| YARMOUTH       | -21.29 | -21.29 | 0    | 0.0  | 20     | 111 | 0   | 29.18 | 29.72 | 0.54 | 2.0  | 10.69 | 211 | 0   | 26.77 | 7.03   | -17.27 | 43.83 | -66.08 |
| CHARLOTTETOWN  | -29.58 | -29.58 | 0    | 0.0  | 20     | 111 | 0   | 33.16 | 33.48 | 0.32 | 1.1  | 15.5  | 311 | 1.3 | 30    | 5.54   | -24.93 | 46.28 | -63.13 |
| BATTLE HARBOUR | -38.28 | -38.28 | 0    | 0.0  | 20     | 111 | 0   | 31.52 | 34.67 | 3.15 | 11.1 | 2.52  | 211 | 0   | 28.36 | 4.98   | -18.74 | 52.25 | -55.6  |
| ST JOHN'S      | -25.64 | -25.64 | 0    | 0.0  | 20     | 111 | 0   | 31.18 | 31.18 | 0    | 0.0  | 20    | 111 | 0   | 26.76 | 4.92   | -21.44 | 47.62 | -52.75 |
| STEPHENVILLE   | -28.93 | -28.93 | 0    | 0.0  | 20     | 111 | 0   | 29.88 | 29.88 | 0    | 0.0  | 20    | 111 | 0   | 29.87 | 0.41   | -30.59 | 48.53 | -58.55 |
| DEASE LAKE     | -48.61 | -44.28 | 4.33 | 10.3 | 999    | 211 | 0   | 32.73 | 32.73 | 0    | 0.0  | 20    | 111 | 0   | 28.92 | -1.09  | -42.22 | 58.42 | -130   |
| FORT NELSON    | -48.2  | -48.2  | 0    | 0.0  | 20     | 111 | 0   | 34.73 | 34.73 | 0    | 0.0  | 20    | 111 | 0   | 31.45 | -0.91  | -42.07 | 58.83 | -122.6 |
| FORT ST JOHN   | -46.17 | -42.37 | 3.8  | 10.0 | 335.53 | 211 | 0   | 33.84 | 33.84 | 0    | 0.0  | 20    | 111 | 0   | 30.16 | 1.77   | -37.94 | 56.23 | -120.7 |
| MAYO           | -58.35 | -55.99 | 2.36 | 4.5  | 175.9  | 211 | 0   | 34.01 | 34.01 | 0    | 0.0  | 20    | 111 | 0   | 30.11 | -3.39  | -52.62 | 63.62 | -135.9 |
| PELLY RANCH    | -60.24 | -54.63 | 5.61 | 10.3 | 999    | 211 | 0   | 33.64 | 33.64 | 0    | 0.0  | 20    | 111 | 0   | 30.24 | -4.3   | -54.41 | 62.82 | -137.4 |
| WATSON LAKE    | -55.38 | -55.38 | 0    | 0.0  | 20     | 111 | 0   | 33.28 | 33.28 | 0    | 0.0  | 20    | 111 | 0   | 29.51 | -2.9   | -49.78 | 60.12 | -128.8 |
| WHITEHORSE     | -49.82 | -46.05 | 3.77 | 8.6  | 999    | 211 | 0   | 32.7  | 32.7  | 0    | 0.0  | 20    | 111 | 0   | 28.89 | -0.84  | -43.94 | 60.72 | -135.1 |
| CAPE PARRY     | -43.67 | -38.91 | 4.76 | 11.4 | 999    | 311 | 1.1 | 23.27 | 23.27 | 0    | 0.0  | 20    | 111 | 0   | 19.62 | -11.86 | -41.87 | 70.17 | -124.7 |
| INUVIK         | -52.19 | -42.52 | 9.67 | 20.0 | 999    | 311 | 1.1 | 31.95 | 31.95 | 0    | 0.0  | 20    | 111 | 0   | 28.98 | -9.43  | -48.39 | 68.3  | -133.5 |
| MOULD BAY      | -52.07 | -52.07 | 0    | 0.0  | 20     | 111 | 0   | 18.3  | 18.3  | 0    | 0.0  | 20    | 111 | 0   | 13.32 | -17.69 | -48.15 | 76.23 | -119.4 |
| NORMAN WELLS   | -51.33 | -47.56 | 3.76 | 8.2  | 999    | 211 | 0   | 33.16 | 34.02 | 0.86 | 2.8  | 7.3   | 211 | 0   | 30.92 | -5.71  | -45.81 | 65.28 | -126.8 |
| TUKTOYAKTUK    | -48.19 | -45.03 | 3.16 | 7.2  | 538.47 | 211 | 0   | 28.49 | 30.38 | 1.89 | 7.2  | 3.29  | 211 | 0   | 26.21 | -10.16 | -43.59 | 69.45 | -133   |
| YELLOWKNIFE    | -49.24 | -45.81 | 3.43 | 7.7  | 999    | 211 | 0   | 31.25 | 31.25 | 0    | 0.0  | 20    | 111 | 0   | 28.46 | -4.9   | -44.7  | 62.47 | -114.4 |
| ALERT          | -52.25 | -46.18 | 6.07 | 12.4 | 999    | 311 | 1.8 | 18.85 | 18.85 | 0    | 0.0  | 20    | 111 | 0   | 14.6  | -18.6  | -48.94 | 82.5  | -62.33 |
| BAKER LAKE     | -50.22 | -46.71 | 3.5  | 7.6  | 999    | 211 | 0   | 29.53 | 32.25 | 2.72 | 10.6 | 4.16  | 211 | 0   | 25.68 | -11.94 | -45.92 | 64.3  | -96.08 |
| CAMBRIDGE BAY  | -49.42 | -47.13 | 2.28 | 4.9  | 999    | 211 | 0   | 24.94 | 24.94 | 0    | 0.0  | 20    | 111 | 0   | 20.25 | -14.63 | -46.2  | 69.1  | -105.1 |
| CLYDE          | -51.37 | -47.24 | 4.12 | 8.9  | 999    | 211 | 0   | 21.52 | 21.52 | 0    | 0.0  | 20    | 111 | 0   | 16.82 | -13.14 | -46.41 | 70.48 | -68.52 |
| CORAL HARBOUR  | -51.21 | -47.71 | 3.49 | 7.6  | 249.06 | 211 | 0   | 25.29 | 27.06 | 1.77 | 8.1  | 4.93  | 211 | 0   | 21.72 | -11.35 | -45.68 | 64.2  | -83.37 |

|             |        |        |      |      |        |     |   |       |       |      |      |      |     |     |       |        |        |       |        |
|-------------|--------|--------|------|------|--------|-----|---|-------|-------|------|------|------|-----|-----|-------|--------|--------|-------|--------|
| EUREKA      | -53.64 | -53.64 | 0    | 0.0  | 20     | 111 | 0 | 18.86 | 21.43 | 2.57 | 17.1 | 2.24 | 311 | 2   | 15.03 | -19.81 | -50.68 | 79.98 | -85.93 |
| HALL BEACH  | -51.43 | -48.93 | 2.51 | 5.3  | 102.59 | 211 | 0 | 21.3  | 25.1  | 3.81 | 20.9 | 2.67 | 211 | 0   | 18.21 | -14.06 | -47.01 | 68.78 | -81.25 |
| IQALUIT     | -45.37 | -41.78 | 3.59 | 8.6  | 999    | 311 | 2 | 24.22 | 25.96 | 1.74 | 8.4  | 4.83 | 211 | 0   | 20.65 | -9.26  | -41.87 | 63.75 | -68.55 |
| KUGLUKTUK   | -48.46 | -46.94 | 1.52 | 3.3  | 97.19  | 211 | 0 | 30.79 | 32.62 | 1.83 | 8.0  | 6.11 | 211 | 0   | 22.81 | -14.08 | -46.52 | 67.82 | -115.1 |
| LUPIN       | -51.46 | -46.09 | 5.37 | 11.8 | 379.59 | 211 | 0 | 26.1  | 30.65 | 4.55 | 19.6 | 1.75 | 211 | 0   | 23.26 | -11.73 | -45.61 | 65.77 | -111.2 |
| PELLY BAY   | -52.11 | -52.11 | 0    | 0.0  | 20     | 111 | 0 | 25.29 | 28.7  | 3.41 | 19.2 | 2.73 | 211 | 0   | 17.78 | -17.04 | -49.53 | 68.53 | -89.8  |
| RESOLUTE    | -50.67 | -47.97 | 2.7  | 5.9  | 175.8  | 211 | 0 | 17.05 | 19.19 | 2.14 | 16.1 | 3.42 | 311 | 1.8 | 13.33 | -16.38 | -45.49 | 74.72 | -94.98 |
| PEACE RIVER | -48.34 | -45.93 | 2.41 | 5.8  | 328.24 | 211 | 0 | 33.59 | 33.59 | 0    | 0.0  | 20   | 111 | 0   | 31.05 | 1      | -41.71 | 56.23 | -117.4 |
| CHURCHILL   | -44.97 | -42.97 | 2    | 4.9  | 402.13 | 211 | 0 | 33.96 | 33.96 | 0    | 0.0  | 20   | 111 | 0   | 30.24 | -6.58  | -41.18 | 58.73 | -94.05 |
| GILLAM      | -47.59 | -44.02 | 3.57 | 6.8  | 999    | 211 | 0 | 35.73 | 35.73 | 0    | 0.0  | 20   | 111 | 0   | 9.48  | -20.26 | -52.47 | 56.35 | -94.72 |
| LYNN LAKE   | -48.98 | -45.08 | 3.9  | 7.8  | 999    | 211 | 0 | 34.42 | 34.42 | 0    | 0.0  | 20   | 111 | 0   | 17.91 | -12.84 | -49.92 | 56.87 | -101.1 |
| INUKJUAK    | -44.51 | -42.88 | 1.62 | 4.1  | 75.77  | 211 | 0 | 26.98 | 30.19 | 3.22 | 14.2 | 3.54 | 311 | 2   | 22.64 | -6.82  | -39.48 | 58.47 | -78.08 |
| KUUJJUAQ    | -45.25 | -45.25 | 0    | 0.0  | 20     | 111 | 0 | 31.79 | 31.79 | 0    | 0.0  | 20   | 111 | 0   | 28.24 | -5.4   | -40.68 | 58.1  | -68.42 |

\* The number 999 denotes that the waiting time (return period) is estimated to be larger than 999 years.

\*\* The three digits denote the trend in location, scale and shape (from left to right), respectively: 1 stands for no trend, 2 for linear trend, and 3 for non-linear (NL) trend.

\*\*\* The NL (non-linear) trend order k=0 indicates that the data series has either a linear trend or no trend.
