# Supplementary material
Source: publisher figshare collection journal article supplement (https://tandf.figshare.com/articles/dataset/_/1061884)
Supplement: Supplementary file 2 [file 1]

Table S1: The estimated 20-yr return values (RV20y) of annual temperature extremes at the 115 long-term stations and changes therein. Positive changes are increases, and negative, decreases.

| Station name   | Annual minimum temperatures (TNn) |              |                                         |                                         |                                                      |                                    |                              |                     |              | Annual maximum temperatures (TXx)       |                                         |                                                      |                                    |                              |      |       |     |     | Climatological values<br>(avgTXx, avgTmean, avgTNn<br>denotes the 1961-1990 mean of<br>TXx, Tmean, TNn, respectively) |       |        | Lat. Long. |        |
|----------------|-----------------------------------|--------------|-----------------------------------------|-----------------------------------------|------------------------------------------------------|------------------------------------|------------------------------|---------------------|--------------|-----------------------------------------|-----------------------------------------|------------------------------------------------------|------------------------------------|------------------------------|------|-------|-----|-----|-----------------------------------------------------------------------------------------------------------------------|-------|--------|------------|--------|
|                | RV20y of TNn in the               |              | 1910-2010<br>changes in<br>RV20y of TNn | 1960-2010<br>changes in RV20y<br>of TNn | Current<br>waiting<br>time* of<br>RV20yP1<br>(years) | Most<br>suitable<br>GEV<br>model** | NL<br>trend<br>order<br>k*** | RV20y of TXx in the |              | 1910-2010<br>changes in RV20y<br>of TXx | 1960-2010<br>changes in RV20y<br>of TXx | Current<br>waiting<br>time* of<br>RV20yP1<br>(years) | Most<br>suitable<br>GEV<br>model** | NL<br>trend<br>order<br>k*** |      |       |     |     |                                                                                                                       |       |        |            |        |
|                | 1910 climate                      | 2010 climate |                                         |                                         |                                                      |                                    |                              | 1910 climate        | 2010 climate |                                         |                                         |                                                      |                                    |                              |      |       |     |     |                                                                                                                       |       |        |            |        |
|                | (RV20yP1)                         | (RV20yP5)    | deg.C                                   | %avgTNn                                 | deg.C                                                | %avgTNn                            | (RV20yP1)                    | (RV20yP5)           | deg.C        | %avgTXx                                 | deg.C                                   | %avgTXx                                              |                                    |                              |      |       |     |     |                                                                                                                       |       |        |            |        |
| AGASSIZ        | -18.83                            | -18.83       | 0                                       | 0.0                                     | 0                                                    | 0.0                                | 20.0                         | 111                 | 0            | 36.99                                   | 36.99                                   | 0                                                    | 0.0                                | 0                            | 0.0  | 20.0  | 111 | 0   | 32.26                                                                                                                 | 9.39  | -10.08 | 49.25      | -121.8 |
| BARKERVILLE    | -45.43                            | -40.26       | 5.17                                    | 59.2                                    | 2.58                                                 | 29.5                               | 636.9                        | 211                 | 0            | 32.83                                   | 32.83                                   | 0                                                    | 0.0                                | 0                            | 0.0  | 20.0  | 111 | 0   | 31                                                                                                                    | 9.57  | -8.74  | 53.07      | -121.5 |
| BELLA COOLA    | -25.25                            | -22.76       | 2.49                                    | 24.8                                    | 1.25                                                 | 12.5                               | 80.0                         | 211                 | 0            | 36.41                                   | 36.41                                   | 0                                                    | 0.0                                | 0                            | 0.0  | 20.0  | 111 | 0   | 24.53                                                                                                                 | 5.28  | -10.03 | 52.37      | -126.7 |
| CRANBROOK      | -39.72                            | -35.59       | 4.14                                    | 24.4                                    | 2.07                                                 | 12.2                               | 999.0                        | 211                 | 0            | 36.9                                    | 36.9                                    | 0                                                    | 0.0                                | 0                            | 0.0  | 20.0  | 111 | 0   | 31.43                                                                                                                 | 7.84  | -16.97 | 49.62      | -115.8 |
| CRESTON        | -27.08                            | -27.08       | 0                                       | 0.0                                     | 0                                                    | 0.0                                | 20.0                         | 111                 | 0            | 38                                      | 38                                      | 0                                                    | 0.0                                | 0                            | 0.0  | 20.0  | 111 | 0   | 24.57                                                                                                                 | 7.04  | -16.68 | 49.1       | -116.5 |
| DARFIELD       | -42.07                            | -34.78       | 7.29                                    | 27.1                                    | 3.64                                                 | 13.5                               | 999.0                        | 211                 | 0            | 40.01                                   | 40.01                                   | 0                                                    | 0.0                                | 0                            | 0.0  | 20.0  | 111 | 0   | 25.88                                                                                                                 | -1.41 | -26.93 | 51.3       | -120.2 |
| FAUQUIER       | -30.74                            | -24.04       | 6.7                                     | 31.8                                    | 3.35                                                 | 15.9                               | 999.0                        | 211                 | 0            | 37.28                                   | 37.28                                   | 0                                                    | 0.0                                | 0                            | 0.0  | 20.0  | 111 | 0   | 32.08                                                                                                                 | 6.21  | -21.04 | 49.87      | -118.1 |
| FORT ST JAMES  | -48.37                            | -42.86       | 5.52                                    | 14.0                                    | 2.76                                                 | 7.0                                | 999.0                        | 211                 | 0            | 34.73                                   | 34.73                                   | 0                                                    | 0.0                                | 0                            | 0.0  | 20.0  | 111 | 0   | 20.38                                                                                                                 | -5.15 | -39.32 | 54.45      | -124.3 |
| GLACIER        | -39.38                            | -34.09       | 5.29                                    | 13.9                                    | 2.65                                                 | 7.0                                | 999.0                        | 211                 | 0            | 28.19                                   | 31.24                                   | 3.05                                                 | 9.9                                | -0.57                        | -1.8 | 2.3   | 311 | 1.1 | 30.85                                                                                                                 | 2.78  | -38.02 | 51.3       | -117.5 |
| GOLDEN         | -42.51                            | -42.51       | 0                                       | 0.0                                     | 0                                                    | 0.0                                | 20.0                         | 111                 | 0            | 36.57                                   | 36.57                                   | 0                                                    | 0.0                                | 0                            | 0.0  | 20.0  | 111 | 0   | 31.34                                                                                                                 | 3.88  | -37.59 | 51.3       | -117   |
| GRAND FORKS    | -38.84                            | -32.77       | 6.06                                    | 17.3                                    | 3.03                                                 | 8.6                                | 999.0                        | 211                 | 0            | 41.3                                    | 39.64                                   | -1.67                                                | -5.0                               | -0.83                        | -2.5 | 271.8 | 211 | 0   | 33.68                                                                                                                 | 5.04  | -35.08 | 49.03      | -118.5 |
| KAMLOOPS       | -34.1                             | -34.1        | 0                                       | 0.0                                     | 0                                                    | 0.0                                | 20.0                         | 111                 | 0            | 40.32                                   | 40.32                                   | 0                                                    | 0.0                                | 0                            | 0.0  | 20.0  | 111 | 0   | 33.6                                                                                                                  | 10.2  | -12.86 | 50.7       | -120.5 |
| KASLO          | -26.37                            | -26.37       | 0                                       | 0.0                                     | 0                                                    | 0.0                                | 20.0                         | 111                 | 0            | 34.79                                   | 37.22                                   | 2.42                                                 | 8.5                                | 1.21                         | 4.2  | 3.2   | 211 | 0   | 28.63                                                                                                                 | 9.93  | -10.45 | 49.92      | -116.9 |
| KELOWNA        | -36.39                            | -28.92       | 7.46                                    | 29.8                                    | 3.73                                                 | 14.9                               | 999.0                        | 211                 | 0            | 40.53                                   | 39.56                                   | -0.96                                                | -2.7                               | 0.68                         | 1.9  | 179.0 | 311 | 1.1 | 35.99                                                                                                                 | 7.47  | -25.03 | 49.87      | -119.5 |
| PENTICTON      | -25.6                             | -22.4        | 3.2                                     | 18.0                                    | 1.6                                                  | 9.0                                | 270.8                        | 211                 | 0            | 39.03                                   | 39.03                                   | 0                                                    | 0.0                                | 0                            | 0.0  | 20.0  | 111 | 0   | 36.32                                                                                                                 | 9.18  | -17.73 | 49.47      | -119.6 |
| PRINCE GEORGE  | -50.73                            | -42.36       | 8.36                                    | 27.5                                    | 4.18                                                 | 13.7                               | 999.0                        | 211                 | 0            | 33.68                                   | 35.45                                   | 1.77                                                 | 4.9                                | 0.89                         | 2.5  | 4.8   | 211 | 0   | 36.23                                                                                                                 | 6.04  | -30.41 | 53.88      | -122.7 |
| PRINCE RUPERT  | -23.49                            | -20.68       | 2.81                                    | 11.7                                    | 1.41                                                 | 5.9                                | 609.8                        | 211                 | 0            | 30.71                                   | 28.35                                   | -2.36                                                | -6.6                               | -1.18                        | -3.3 | 124.5 | 211 | 0   | 35.53                                                                                                                 | 8.02  | -24.06 | 54.28      | -130.5 |
| PRINCETON      | -40.22                            | -40.22       | 0                                       | 0.0                                     | 0                                                    | 0.0                                | 20.0                         | 111                 | 0            | 39.12                                   | 39.12                                   | 0                                                    | 0.0                                | 0                            | 0.0  | 20.0  | 111 | 0   | 36.72                                                                                                                 | 7.57  | -26.85 | 49.47      | -120.5 |
| QUATSINO       | -13.11                            | -11.27       | 1.84                                    | 9.3                                     | 0.92                                                 | 4.7                                | 48.2                         | 211                 | 0            | 31.94                                   | 31.94                                   | 0                                                    | 0.0                                | 0                            | 0.0  | 20.0  | 111 | 0   | 33.94                                                                                                                 | 8.02  | -19.75 | 50.53      | -127.7 |
| QUESNEL        | -45.31                            | -41.55       | 3.76                                    | 19.3                                    | 1.88                                                 | 9.6                                | 999.0                        | 211                 | 0            | 37.64                                   | 37.64                                   | 0                                                    | 0.0                                | 0                            | 0.0  | 20.0  | 111 | 0   | 34.33                                                                                                                 | 7.49  | -19.49 | 53.03      | -122.5 |
| SALMON ARM     | -36.92                            | -31.43       | 5.49                                    | 27.3                                    | 2.74                                                 | 13.6                               | 999.0                        | 211                 | 0            | 39.41                                   | 37.75                                   | -1.65                                                | -5.0                               | -0.83                        | -2.5 | 329.6 | 211 | 0   | 32.74                                                                                                                 | 7.32  | -20.11 | 50.68      | -119.2 |
| SHAWNIGAN LAKE | -15.44                            | -15.44       | 0                                       | 0.0                                     | 0                                                    | 0.0                                | 20.0                         | 111                 | 0            | 33.96                                   | 36.09                                   | 2.13                                                 | 7.2                                | 1.07                         | 3.6  | 2.9   | 211 | 0   | 29.78                                                                                                                 | 2.25  | -32.75 | 48.65      | -123.6 |
| STEWART        | -29.01                            | -25.16       | 3.85                                    | 11.2                                    | 1.92                                                 | 5.6                                | 999.0                        | 211                 | 0            | 30.8                                    | 34.3                                    | 3.5                                                  | 13.1                               | 1.75                         | 6.6  | 2.0   | 211 | 0   | 26.69                                                                                                                 | -0.16 | -34.49 | 55.93      | -130   |
| TERRACE        | -25.07                            | -22.43       | 2.64                                    | 10.2                                    | 4.84                                                 | 18.8                               | 999.0                        | 311                 | 1.9          | 34.05                                   | 36.29                                   | 2.24                                                 | 6.0                                | 1.12                         | 3.0  | 3.4   | 211 | 0   | 37.38                                                                                                                 | 8.75  | -25.81 | 54.47      | -128.6 |
| VANCOUVER      | -17.51                            | -14.75       | 2.77                                    | 9.8                                     | 1.38                                                 | 4.9                                | 635.6                        | 211                 | 0            | 29.71                                   | 32.38                                   | 2.67                                                 | 8.8                                | 1.34                         | 4.4  | 2.4   | 211 | 0   | 30.31                                                                                                                 | 3.17  | -28.31 | 49.2       | -123.2 |
| VAVENBY        | -46.09                            | -36          | 10.09                                   | 33.1                                    | 5.05                                                 | 16.6                               | 999.0                        | 211                 | 0            | 40.25                                   | 38.47                                   | -1.77                                                | -5.0                               | -0.89                        | -2.5 | 999.0 | 211 | 0   | 35.75                                                                                                                 | 6.24  | -30.48 | 51.58      | -119.8 |
| VERNON         | -32.82                            | -32.82       | 0                                       | 0.0                                     | 0                                                    | 0.0                                | 20.0                         | 111                 | 0            | 38.81                                   | 38.81                                   | 0                                                    | 0.0                                | 0                            | 0.0  | 20.0  | 111 | 0   | 29.05                                                                                                                 | 1.51  | -30.06 | 50.23      | -119.2 |
| VICTORIA       | -15.62                            | -13.64       | 1.98                                    | 6.1                                     | 0.99                                                 | 3.0                                | 55.6                         | 211                 | 0            | 35.48                                   | 35.48                                   | 0                                                    | 0.0                                | 0                            | 0.0  | 20.0  | 111 | 0   | 33.58                                                                                                                 | 4.76  | -32.48 | 48.45      | -123.3 |

|                 |        |        |       |      |      |      |       |     |     |       |       |       |      |       |      |       |     |     |       |        |        |       |        |
|-----------------|--------|--------|-------|------|------|------|-------|-----|-----|-------|-------|-------|------|-------|------|-------|-----|-----|-------|--------|--------|-------|--------|
| DAWSON          | -56.56 | -56.56 | 0     | 0.0  | 0    | 0.0  | 20.0  | 111 | 0   | 32.81 | 34.14 | 1.33  | 4.4  | 0.66  | 2.2  | 6.5   | 211 | 0   | 30.31 | -5.3   | -51.73 | 64.05 | -139.1 |
| FORT SIMPSON    | -53.12 | -50.15 | 2.97  | 6.5  | 1.49 | 3.3  | 132.0 | 211 | 0   | 33.06 | 35.31 | 2.25  | 7.1  | 0.29  | 0.9  | 5.1   | 311 | 1.1 | 31.55 | -3.51  | -45.59 | 61.77 | -121.2 |
| FORT SMITH      | -55.48 | -46.36 | 9.12  | 20.1 | 4.56 | 10.0 | 999.0 | 211 | 0   | 35.21 | 35.21 | 0     | 0.0  | 0     | 0.0  | 20.0  | 111 | 0   | 31.49 | -2.63  | -45.38 | 60.02 | -112   |
| HAY RIVER       | -49.78 | -41.54 | 8.23  | 18.9 | 6.58 | 15.1 | 999.0 | 311 | 1.2 | 32.95 | 35.58 | 2.63  | 8.4  | 1.31  | 4.2  | 2.9   | 211 | 0   | 31.33 | -3.1   | -43.62 | 60.83 | -115.8 |
| BANFF           | -47.96 | -43.63 | 4.33  | 11.1 | 2.16 | 5.5  | 302.1 | 211 | 0   | 33.44 | 33.44 | 0     | 0.0  | 0     | 0.0  | 20.0  | 111 | 0   | 31.49 | 2.69   | -39    | 51.2  | -115.6 |
| BEAVERLODGE     | -46.33 | -43.27 | 3.07  | 8.0  | 1.53 | 4.0  | 999.0 | 211 | 0   | 34.03 | 34.03 | 0     | 0.0  | 0     | 0.0  | 20.0  | 111 | 0   | 31.56 | 2.39   | -38.61 | 55.2  | -119.4 |
| CALGARY         | -40.81 | -37.69 | 3.12  | 8.0  | 1.56 | 4.0  | 999.0 | 211 | 0   | 34.95 | 34.95 | 0     | 0.0  | 0     | 0.0  | 20.0  | 111 | 0   | 32.18 | 2.05   | -39.05 | 51.12 | -114   |
| CALMAR          | -50.44 | -43.89 | 6.56  | 17.1 | 3.28 | 8.5  | 999.0 | 211 | 0   | 34.72 | 34.72 | 0     | 0.0  | 0     | 0.0  | 20.0  | 111 | 0   | 31.95 | 2.46   | -38.37 | 53.28 | -113.9 |
| CAMPSIE         | -52.1  | -46.89 | 5.21  | 15.0 | 2.6  | 7.5  | 999.0 | 211 | 0   | 35.08 | 35.08 | 0     | 0.0  | 0     | 0.0  | 20.0  | 111 | 0   | 31.24 | 2.99   | -34.76 | 54.13 | -114.7 |
| EDMONTON        | -50.59 | -43.99 | 6.6   | 19.7 | 3.3  | 9.9  | 999.0 | 211 | 0   | 33.82 | 35.29 | 1.47  | 4.5  | 0.73  | 2.2  | 5.5   | 211 | 0   | 32.62 | 4.23   | -33.47 | 53.57 | -113.5 |
| EDSON           | -48.39 | -43.84 | 4.55  | 12.1 | 2.27 | 6.0  | 999.0 | 211 | 0   | 36.86 | 34.2  | -2.66 | -7.8 | 0.11  | 0.3  | 999.0 | 311 | 1.9 | 34.15 | 0.38   | -37.67 | 53.58 | -116.5 |
| FORT CHIPEWYAN  | -50.18 | -50.18 | 0     | 0.0  | 0    | 0.0  | 20.0  | 111 | 0   | 32.87 | 34.6  | 1.73  | 6.8  | 0.86  | 3.4  | 3.2   | 211 | 0   | 25.39 | -1.56  | -39.09 | 58.77 | -111.1 |
| FORT MCMURRAY   | -53.89 | -43.24 | 10.64 | 29.3 | 5.32 | 14.7 | 999.0 | 211 | 0   | 36.56 | 36.56 | 0     | 0.0  | 0     | 0.0  | 20.0  | 111 | 0   | 36.67 | 5.8    | -36.29 | 56.65 | -111.2 |
| GLEICHEN        | -44.54 | -40.91 | 3.64  | 10.4 | 1.82 | 5.2  | 999.0 | 211 | 0   | 36.98 | 36.98 | 0     | 0.0  | 0     | 0.0  | 20.0  | 111 | 0   | 33.11 | 4.85   | -34.93 | 50.88 | -113.1 |
| LACOMBE         | -48.32 | -42.65 | 5.67  | 15.9 | 2.84 | 7.9  | 999.0 | 211 | 0   | 36.17 | 36.17 | 0     | 0.0  | 0     | 0.0  | 20.0  | 111 | 0   | 31.16 | 1.83   | -35.77 | 52.45 | -113.8 |
| LETHBRIDGE      | -43.41 | -38.54 | 4.86  | 11.0 | 2.43 | 5.5  | 999.0 | 211 | 0   | 37.13 | 37.13 | 0     | 0.0  | 0     | 0.0  | 20.0  | 111 | 0   | 27.04 | -1.63  | -44.31 | 49.63 | -112.8 |
| MEDICINE HAT    | -46.28 | -39.96 | 6.32  | 16.0 | 3.16 | 8.0  | 999.0 | 211 | 0   | 38.99 | 39.8  | 0.81  | 2.6  | -0.49 | -1.6 | 9.9   | 311 | 1.8 | 30.92 | 1.9    | -39.59 | 50.02 | -110.7 |
| OLDS            | -43.73 | -38.17 | 5.56  | 13.3 | 2.78 | 6.7  | 999.0 | 211 | 0   | 34.88 | 34.88 | 0     | 0.0  | 0     | 0.0  | 20.0  | 111 | 0   | 32.67 | 0.51   | -41.71 | 51.78 | -114.1 |
| PINCHER CREEK   | -41.64 | -41.64 | 0     | 0.0  | 0    | 0.0  | 20.0  | 111 | 0   | 34.78 | 36.09 | 1.31  | 4.2  | 0.66  | 2.1  | 4.3   | 211 | 0   | 30.86 | 1.99   | -38.89 | 49.52 | -114   |
| RANFURLY        | -50.25 | -42.53 | 7.72  | 13.7 | 3.86 | 6.9  | 999.0 | 211 | 0   | 32.15 | 35.62 | 3.47  | 64.5 | -0.33 | -6.1 | 2.7   | 311 | 1.1 | 5.38  | -21.34 | -56.19 | 53.42 | -111.7 |
| INDIAN HEAD     | -46.02 | -41.85 | 4.17  | 10.8 | 2.09 | 5.4  | 999.0 | 211 | 0   | 38.67 | 38.67 | 0     | 0.0  | 0     | 0.0  | 20.0  | 111 | 0   | 34.46 | 1.25   | -38.78 | 50.55 | -103.7 |
| LOST RIVER      | -46.31 | -46.31 | 0     | 0.0  | 0    | 0.0  | 20.0  | 111 | 0   | 38.38 | 38.38 | 0     | 0.0  | 0     | 0.0  | 20.0  | 111 | 0   | 37.02 | 3.88   | -36.19 | 53.28 | -104.3 |
| MOOSE JAW       | -44.47 | -40.74 | 3.73  | 9.7  | 1.86 | 4.9  | 999.0 | 211 | 0   | 37.14 | 39.43 | 2.29  | 6.3  | -0.24 | -0.7 | 3.3   | 311 | 2   | 36.1  | 2.93   | -38.26 | 50.33 | -105.6 |
| NORTHBATTLEFORD | -48.44 | -44.08 | 4.37  | 10.5 | 2.18 | 5.2  | 999.0 | 211 | 0   | 36.86 | 38.09 | 1.23  | 4.3  | 0.62  | 2.2  | 6.2   | 211 | 0   | 28.37 | -3.6   | -41.55 | 52.77 | -108.3 |
| OUTLOOK         | -47.17 | -42.82 | 4.35  | 11.9 | 2.17 | 5.9  | 632.3 | 211 | 0   | 38.95 | 38.95 | 0     | 0.0  | 0     | 0.0  | 20.0  | 111 | 0   | 35.42 | 3.73   | -36.52 | 51.48 | -107.1 |
| PRINCE ALBERT   | -51.52 | -46.09 | 5.43  | 13.9 | 2.71 | 6.9  | 999.0 | 211 | 0   | 35.76 | 36.06 | 0.29  | 0.8  | -1.04 | -3.0 | 15.3  | 311 | 2   | 34.41 | 2.1    | -39.06 | 53.22 | -105.7 |
| REGINA          | -46.22 | -42.42 | 3.79  | 9.6  | 1.9  | 4.8  | 999.0 | 211 | 0   | 39.77 | 39.77 | 0     | 0.0  | 0     | 0.0  | 20.0  | 111 | 0   | 34.46 | 1.56   | -39.6  | 50.43 | -104.7 |
| SASKATOON       | -47.13 | -43.12 | 4.02  | 10.5 | 2.01 | 5.2  | 999.0 | 211 | 0   | 39.15 | 39.15 | 0     | 0.0  | 0     | 0.0  | 20.0  | 111 | 0   | 33.1  | 1.49   | -38.38 | 52.17 | -106.7 |
| SCOTT           | -49.5  | -43.67 | 5.83  | 14.7 | 2.92 | 7.4  | 999.0 | 211 | 0   | 38.07 | 38.07 | 0     | 0.0  | 0     | 0.0  | 20.0  | 111 | 0   | 36.05 | -0.27  | -39.7  | 52.37 | -108.8 |
| SWIFT CURRENT   | -43.69 | -41.46 | 2.24  | 5.3  | 1.12 | 2.7  | 83.1  | 211 | 0   | 38.55 | 38.55 | 0     | 0.0  | 0     | 0.0  | 20.0  | 111 | 0   | 33.53 | 0.9    | -42.04 | 50.27 | -107.7 |
| WASECA          | -49.73 | -41.1  | 8.64  | 22.3 | 4.32 | 11.1 | 999.0 | 211 | 0   | 36.92 | 36.92 | 0     | 0.0  | 0     | 0.0  | 20.0  | 111 | 0   | 35.24 | 2.32   | -38.81 | 53.13 | -109.4 |
| YELLOW GRASS    | -43.44 | -43.44 | 0     | 0.0  | 0    | 0.0  | 20.0  | 111 | 0   | 41.15 | 41.15 | 0     | 0.0  | 0     | 0.0  | 20.0  | 111 | 0   | 33.38 | 0.3    | -41.2  | 49.82 | -104.2 |
| BRANDON         | -45.63 | -42.84 | 2.79  | 7.0  | 1.39 | 3.5  | 999.0 | 211 | 0   | 40.06 | 40.06 | 0     | 0.0  | 0     | 0.0  | 20.0  | 111 | 0   | 36.05 | 2.27   | -39.68 | 49.87 | -99.98 |
| DAUPHIN         | -43.72 | -41.21 | 2.51  | 7.3  | 1.26 | 3.7  | 257.6 | 211 | 0   | 33.77 | 36.43 | 2.66  | 7.3  | -0.99 | -2.7 | 3.6   | 311 | 1.1 | 36.23 | 3.67   | -34.37 | 51.1  | -100.1 |
| INDIAN BAY      | -43.91 | -43.91 | 0     | 0.0  | 0    | 0.0  | 20.0  | 111 | 0   | 35.74 | 35.74 | 0     | 0.0  | 0     | 0.0  | 20.0  | 111 | 0   | 33.61 | 2.17   | -41.59 | 49.62 | -95.2  |

|                 |        |        |       |      |       |      |       |     |     |       |       |       |       |       |      |       |     |     |       |        |        |       |        |
|-----------------|--------|--------|-------|------|-------|------|-------|-----|-----|-------|-------|-------|-------|-------|------|-------|-----|-----|-------|--------|--------|-------|--------|
| MORDEN EXP FARM | -41.48 | -38.18 | 3.3   | 8.9  | 1.65  | 4.5  | 570.4 | 211 | 0   | 39.07 | 37.41 | -1.67 | -4.7  | -2.44 | -6.9 | 88.0  | 311 | 1.1 | 35.17 | 2.78   | -36.94 | 49.18 | -98.08 |
| PINAWA          | -46.2  | -43.68 | 2.53  | 6.4  | 1.26  | 3.2  | 189.0 | 211 | 0   | 36.34 | 36.34 | 0     | 0.0   | 0     | 0.0  | 20.0  | 111 | 0   | 32.57 | 2.21   | -39.31 | 50.18 | -96.07 |
| SPRAGUE         | -48.63 | -44.93 | 3.7   | 9.2  | 1.85  | 4.6  | 999.0 | 211 | 0   | 36.74 | 36.74 | 0     | 0.0   | 0     | 0.0  | 20.0  | 111 | 0   | 33.1  | 2.06   | -40.03 | 49.02 | -95.6  |
| THE PAS         | -45.27 | -45.27 | 0     | 0.0  | 0     | 0.0  | 20.0  | 111 | 0   | 35.75 | 35.75 | 0     | 0.0   | 0     | 0.0  | 20.0  | 111 | 0   | 34.76 | 1.76   | -38.23 | 53.97 | -101.1 |
| WINNIPEG        | -43.94 | -41.89 | 2.05  | 5.0  | -0.15 | -0.4 | 154.9 | 311 | 1.7 | 38.42 | 38.42 | 0     | 0.0   | 0     | 0.0  | 20.0  | 111 | 0   | 32.07 | 0.06   | -40.72 | 49.92 | -97.23 |
| BEATRICE        | -39.2  | -40.93 | -1.73 | -4.1 | -0.86 | -2.0 | 6.6   | 211 | 0   | 34.71 | 34.71 | 0     | 0.0   | 0     | 0.0  | 20.0  | 111 | 0   | 28.74 | -0.8   | -42.52 | 45.13 | -79.4  |
| BROCKVILLE      | -37.43 | -31.1  | 6.33  | 15.4 | 3.16  | 7.7  | 999.0 | 211 | 0   | 35.59 | 35.59 | 0     | 0.0   | 0     | 0.0  | 20.0  | 111 | 0   | 27.37 | -1.43  | -41.12 | 44.6  | -75.67 |
| DRYDEN          | -46.61 | -40.98 | 5.63  | 15.4 | 2.82  | 7.7  | 999.0 | 211 | 0   | 35.83 | 35.83 | 0     | 0.0   | 0     | 0.0  | 20.0  | 111 | 0   | 32.35 | 2.67   | -36.65 | 49.78 | -92.83 |
| FORT FRANCES    | -43.87 | -43.87 | 0     | 0.0  | 0     | 0.0  | 20.0  | 111 | 0   | 37.15 | 37.15 | 0     | 0.0   | 0     | 0.0  | 20.0  | 111 | 0   | 32.38 | 1.61   | -39.77 | 48.65 | -93.43 |
| GORE BAY        | -35.08 | -35.08 | 0     | 0.0  | 0     | 0.0  | 20.0  | 111 | 0   | 34.46 | 34.46 | 0     | 0.0   | 0     | 0.0  | 20.0  | 111 | 0   | 33.08 | 2.83   | -35.87 | 45.88 | -82.57 |
| HALIBURTON      | -42.02 | -42.02 | 0     | 0.0  | 0     | 0.0  | 20.0  | 111 | 0   | 35.27 | 35.27 | 0     | 0.0   | 0     | 0.0  | 20.0  | 111 | 0   | 32.67 | 0.99   | -40.01 | 45.03 | -78.53 |
| HARROW          | -26.31 | -26.31 | 0     | 0.0  | 0     | 0.0  | 20.0  | 111 | 0   | 37.95 | 37.95 | 0     | 0.0   | 0     | 0.0  | 20.0  | 111 | 0   | 32.85 | -0.49  | -39.65 | 42.03 | -82.9  |
| KAPUSKASING     | -47.21 | -42.16 | 5.04  | 16.6 | 2.52  | 8.3  | 999.0 | 211 | 0   | 36.26 | 36.26 | 0     | 0.0   | 0     | 0.0  | 20.0  | 111 | 0   | 30.25 | 5.46   | -30.35 | 49.42 | -82.47 |
| KENORA          | -43.22 | -39.13 | 4.09  | 12.4 | 2.05  | 6.2  | 999.0 | 211 | 0   | 36.07 | 36.07 | 0     | 0.0   | 0     | 0.0  | 20.0  | 111 | 0   | 27.61 | -0.21  | -32.9  | 49.78 | -94.37 |
| KINGSTON        | -35.22 | -31.37 | 3.85  | 8.2  | 1.92  | 4.1  | 508.4 | 211 | 0   | 33.97 | 35.15 | 1.18  | 36.1  | 0.59  | 18.0 | 6.6   | 211 | 0   | -3.27 | -21.16 | -46.94 | 44.22 | -76.6  |
| LONDON          | -31.64 | -28.4  | 3.24  | 10.1 | 0.59  | 1.8  | 929.0 | 311 | 1.1 | 36.89 | 36.89 | 0     | 0.0   | 0     | 0.0  | 20.0  | 111 | 0   | 32.33 | 6.49   | -32.12 | 43.03 | -81.15 |
| MOOSONEE        | -45.14 | -42.98 | 2.16  | 7.2  | 1.08  | 3.6  | 236.6 | 211 | 0   | 36.34 | 36.34 | 0     | 0.0   | 0     | 0.0  | 20.0  | 111 | 0   | 33.34 | 6.04   | -29.82 | 51.27 | -80.65 |
| MORRISBURG      | -39.52 | -35.62 | 3.9   | 10.2 | 1.95  | 5.1  | 999.0 | 211 | 0   | 35.53 | 35.53 | 0     | 0.0   | 0     | 0.0  | 20.0  | 111 | 0   | 26.61 | 0.95   | -38.39 | 44.92 | -75.18 |
| OTTAWA          | -36.53 | -30.13 | 6.41  | 18.5 | 5.79  | 16.7 | 999.0 | 311 | 1.4 | 37.52 | 36    | -1.52 | -10.9 | -0.76 | -5.4 | 333.3 | 211 | 0   | 13.98 | -7.34  | -34.74 | 45.38 | -75.72 |
| OWEN SOUND      | -33.87 | -28.8  | 5.08  | 23.3 | 2.54  | 11.6 | 435.4 | 211 | 0   | 35.99 | 34.84 | -1.15 | -3.3  | -0.57 | -1.6 | 139.6 | 211 | 0   | 34.97 | 9.57   | -21.83 | 44.58 | -80.93 |
| PETERBOROUGH    | -39.94 | -35.56 | 4.38  | 18.6 | 2.19  | 9.3  | 999.0 | 211 | 0   | 35.81 | 35.81 | 0     | 0.0   | 0     | 0.0  | 20.0  | 111 | 0   | 32.94 | 7.6    | -23.52 | 44.23 | -78.37 |
| SIOUX LOOKOUT   | -44.98 | -42.53 | 2.46  | 11.4 | 1.23  | 5.7  | 250.4 | 211 | 0   | 36.42 | 36.42 | 0     | 0.0   | 0     | 0.0  | 20.0  | 111 | 0   | 33.77 | 8.96   | -21.56 | 50.12 | -91.9  |
| THUNDER BAY     | -42.89 | -38.75 | 4.14  | 10.3 | 2.07  | 5.1  | 999.0 | 211 | 0   | 35.83 | 37.41 | 1.58  | 7.0   | 0.79  | 3.5  | 7.5   | 211 | 0   | 22.47 | -2.11  | -40.22 | 48.37 | -89.33 |
| TORONTO         | -28.93 | -24.68 | 4.25  | 12.5 | 2.13  | 6.3  | 999.0 | 211 | 0   | 37.58 | 37.58 | 0     | 0.0   | 0     | 0.0  | 20.0  | 111 | 0   | 28.16 | 2.42   | -33.91 | 43.67 | -79.4  |
| BAGOTVILLE      | -42.57 | -38.2  | 4.37  | 13.2 | 2.19  | 6.6  | 999.0 | 211 | 0   | 35.69 | 37.39 | 1.7   | 6.0   | 0.85  | 3.0  | 5.1   | 211 | 0   | 28.23 | 2.73   | -33.17 | 48.33 | -71    |
| BEAUCEVILLE     | -41    | -41    | 0     | 0.0  | 0     | 0.0  | 20.0  | 111 | 0   | 34.79 | 34.79 | 0     | 0.0   | 0     | 0.0  | 20.0  | 111 | 0   | 32.05 | 5.06   | -30.18 | 46.15 | -70.7  |
| BROME           | -40.87 | -40.87 | 0     | 0.0  | 0     | 0.0  | 20.0  | 111 | 0   | 33.5  | 34.93 | 1.43  | 137.5 | 0.71  | 68.3 | 4.3   | 211 | 0   | 1.04  | -26.57 | -54.82 | 45.18 | -72.57 |
| LA POCATIERE    | -33.63 | -33.63 | 0     | 0.0  | 0     | 0.0  | 20.0  | 111 | 0   | 34.15 | 34.15 | 0     | 0.0   | 0     | 0.0  | 20.0  | 111 | 0   | 32.4  | 5.31   | -35.09 | 47.35 | -70.03 |
| LENNOXVILLE     | -44.98 | -36.75 | 8.23  | 31.7 | 4.11  | 15.8 | 999.0 | 211 | 0   | 35.33 | 35.33 | 0     | 0.0   | 0     | 0.0  | 20.0  | 111 | 0   | 32.71 | 7.51   | -25.96 | 45.37 | -71.82 |
| LES CEDRES      | -35.99 | -35.99 | 0     | 0.0  | 0     | 0.0  | 20.0  | 111 | 0   | 36.22 | 35.08 | -1.14 | -7.8  | -0.57 | -3.9 | 204.6 | 211 | 0   | 14.62 | -8.87  | -39.31 | 45.3  | -74.05 |
| MONT JOLI       | -34.74 | -30.2  | 4.54  | 11.1 | 2.27  | 5.6  | 999.0 | 211 | 0   | 32.96 | 34.5  | 1.54  | 6.7   | 0.77  | 3.3  | 4.7   | 211 | 0   | 23.02 | -2.75  | -40.86 | 48.6  | -68.2  |
| MONTREAL TAVISH | -33.05 | -28.83 | 4.21  | 10.4 | 2.11  | 5.2  | 999.0 | 211 | 0   | 34.6  | 35.48 | 0.88  | 5.9   | 0.44  | 2.9  | 7.0   | 211 | 0   | 15.02 | -8.9   | -40.46 | 45.47 | -73.75 |
| NICOLET         | -37.71 | -37.71 | 0     | 0.0  | 0     | 0.0  | 20.0  | 111 | 0   | 35.01 | 35.01 | 0     | 0.0   | 0     | 0.0  | 20.0  | 111 | 0   | 27.08 | 0.76   | -31.6  | 46.2  | -72.62 |
| QUEBEC          | -35.53 | -33.35 | 2.18  | 7.7  | 1.09  | 3.9  | 523.8 | 211 | 0   | 34.46 | 34.46 | 0     | 0.0   | 0     | 0.0  | 20.0  | 111 | 0   | 31.14 | 3.43   | -28.29 | 46.8  | -71.38 |
| TETE BALEINE    | -41.36 | -36.25 | 5.11  | 14.7 | 2.55  | 7.3  | 999.0 | 211 | 0   | 28.16 | 31.95 | 3.79  | 11.4  | 1.89  | 5.7  | 2.5   | 211 | 0   | 33.35 | 2.64   | -34.88 | 50.7  | -59.32 |

|                 |        |        |      |      |       |      |       |     |   |       |       |       |      |       |      |      |     |     |       |      |        |       |        |
|-----------------|--------|--------|------|------|-------|------|-------|-----|---|-------|-------|-------|------|-------|------|------|-----|-----|-------|------|--------|-------|--------|
| CHATHAM MIRA.   | -35.99 | -33.53 | 2.46 | 8.4  | 1.23  | 4.2  | 148.0 | 211 | 0 | 35.99 | 36.52 | 0.53  | 1.6  | -0.57 | -1.7 | 11.6 | 311 | 1.9 | 34.19 | 4.65 | -29.28 | 47.02 | -65.47 |
| FREDERICTON     | -36.75 | -33.25 | 3.5  | 11.6 | 1.75  | 5.8  | 999.0 | 211 | 0 | 35.66 | 36.83 | 1.17  | 3.5  | 0.58  | 1.7  | 5.9  | 211 | 0   | 33.72 | 5.67 | -30.26 | 45.87 | -66.53 |
| MONCTON         | -30.87 | -30.87 | 0    | 0.0  | 0     | 0.0  | 20.0  | 111 | 0 | 33.21 | 36.07 | 2.86  | 9.0  | 1.43  | 4.5  | 2.3  | 211 | 0   | 31.93 | 5.4  | -27.66 | 46.1  | -64.68 |
| SAINT JOHN      | -31.82 | -34.22 | -2.4 | -8.1 | -1.32 | -4.4 | 5.4   | 121 | 0 | 31.44 | 33.59 | 2.16  | 7.3  | 1.08  | 3.7  | 3.4  | 211 | 0   | 29.55 | 4.65 | -29.78 | 45.32 | -65.88 |
| SUSSEX          | -41.53 | -35.07 | 6.46 | 20.4 | 3.23  | 10.2 | 999.0 | 211 | 0 | 32.88 | 36.54 | 3.66  | 11.5 | 1.83  | 5.7  | 1.7  | 211 | 0   | 31.89 | 5.48 | -31.72 | 45.72 | -65.53 |
| HALIFAX         | -26.79 | -25.13 | 1.66 | 7.9  | 0.83  | 3.9  | 118.4 | 211 | 0 | 33.2  | 33.2  | 0     | 0.0  | 0     | 0.0  | 20.0 | 111 | 0   | 29.9  | 6.76 | -21.13 | 44.65 | -63.58 |
| KENTVILLE       | -30.6  | -26.24 | 4.36 | 19.4 | 2.18  | 9.7  | 999.0 | 211 | 0 | 35.26 | 35.26 | 0     | 0.0  | 0     | 0.0  | 20.0 | 111 | 0   | 31.82 | 6.91 | -22.45 | 45.07 | -64.48 |
| NAPPAN          | -35.34 | -32.78 | 2.56 | 8.9  | 1.28  | 4.5  | 159.5 | 211 | 0 | 32.65 | 32.65 | 0     | 0.0  | 0     | 0.0  | 20.0 | 111 | 0   | 29.45 | 5.58 | -28.74 | 45.77 | -64.25 |
| PARRSBORO       | -35.14 | -29.34 | 5.8  | 19.6 | 2.9   | 9.8  | 999.0 | 211 | 0 | 29.25 | 30.67 | 1.42  | 4.5  | -0.5  | -1.6 | 4.6  | 311 | 1.1 | 31.66 | 5.95 | -29.6  | 45.4  | -64.33 |
| SABLE ISLAND    | -17.5  | -15.61 | 1.89 | 6.5  | 0.95  | 3.3  | 166.8 | 211 | 0 | 26.13 | 26.13 | 0     | 0.0  | 0     | 0.0  | 20.0 | 111 | 0   | 24.06 | 1.93 | -29.09 | 43.93 | -60.02 |
| SYDNEY          | -29.84 | -24.68 | 5.16 | 40.8 | 2.58  | 20.4 | 999.0 | 211 | 0 | 33.44 | 34.85 | 1.42  | 6.0  | 0.71  | 3.0  | 6.1  | 211 | 0   | 23.53 | 7.62 | -12.65 | 46.17 | -60.05 |
| UPPER STEWIACKE | -37.29 | -34.13 | 3.16 | 14.4 | 1.58  | 7.2  | 174.3 | 211 | 0 | 33.87 | 35.23 | 1.35  | 4.3  | 0.68  | 2.2  | 6.2  | 211 | 0   | 31.33 | 5.81 | -21.93 | 45.22 | -63    |
| YARMOUTH        | -21.62 | -20.56 | 1.06 | 6.1  | 0.53  | 3.1  | 47.3  | 211 | 0 | 28.64 | 29.72 | 1.09  | 4.1  | 0.54  | 2.0  | 6.2  | 211 | 0   | 26.77 | 7.03 | -17.27 | 43.83 | -66.08 |
| CHARLOTTETOWN   | -30.05 | -27.85 | 2.21 | 8.9  | 1.1   | 4.4  | 253.2 | 211 | 0 | 32.7  | 33.59 | 0.89  | 3.0  | 0.45  | 1.5  | 10.0 | 211 | 0   | 30    | 5.54 | -24.93 | 46.28 | -63.13 |
| BATTLE HARBOUR  | -39.28 | -34.4  | 4.88 | 26.0 | 2.44  | 13.0 | 999.0 | 211 | 0 | 27.32 | 38.95 | 11.63 | 41.0 | 8.3   | 29.3 | 1.0  | 311 | 1.3 | 28.36 | 4.98 | -18.74 | 52.25 | -55.6  |
| ST JOHN'S       | -26.09 | -21.92 | 4.16 | 19.4 | 2.08  | 9.7  | 509.9 | 211 | 0 | 31.18 | 31.18 | 0     | 0.0  | 0     | 0.0  | 20.0 | 111 | 0   | 26.76 | 4.92 | -21.44 | 47.62 | -52.75 |
| STEPHENVILLE    | -30.21 | -26.24 | 3.97 | 13.0 | 1.99  | 6.5  | 687.6 | 211 | 0 | 29.04 | 30.89 | 1.85  | 6.2  | 0.92  | 3.1  | 4.1  | 211 | 0   | 29.87 | 0.41 | -30.59 | 48.53 | -58.55 |

\* The number 999 denotes that the waiting time (return period) is estimated to be larger than 999 years.

\*\* The three digits denote the trend in location, scale and shape (from left to right), respectively: 1 stands for no trend, 2 for linear trend, and 3 for non-linear (NL) trend.

\*\*\* The NL (non-linear) trend order k=0 indicates that the data series has either a linear trend or no trend.
